# Supplementary material for: Similarity maps - a visualization strategy for molecular fingerprints and machine-learning methods
Source: PubMed Central journal article supplement (PMC3852750; doi:10.1186/1758-2946-5-43), 2013-09-24
Supplement: 1758-2946-5-43-S2.pdf [file 1758-2946-5-43-S2.pdf]

# Open-Source Platform to Benchmark Fingerprints for Ligand-Based Virtual Screening

Sereina Riniker<sup>1</sup> and Gregory A. Landrum<sup>\*1</sup>

<sup>1</sup> Novartis Institutes for BioMedical Research, Basel, Switzerland

Email: Sereina Riniker - [sereina.riniker@novartis.com](mailto:sereina.riniker@novartis.com); Gregory A. Landrum\* - [gregory.landrum@novartis.com](mailto:gregory.landrum@novartis.com);

\*Corresponding author

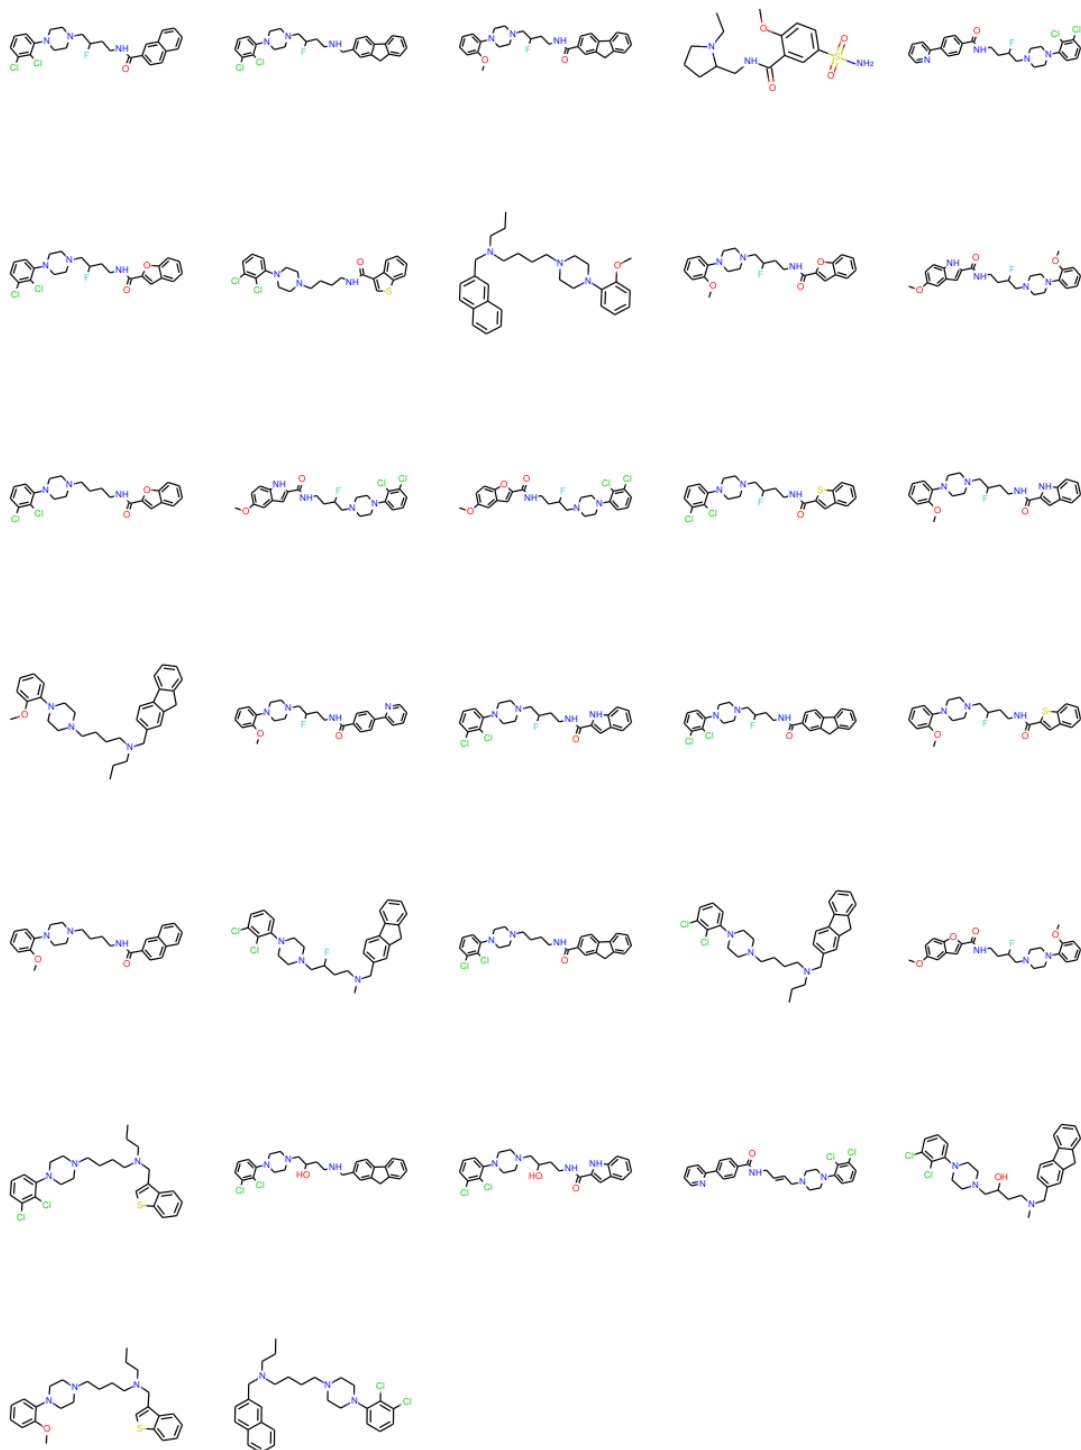

Figure S1: Active molecules (activity smaller than 10  $\mu$ M) of [1]

## References

1. Banala AK, Levy BA, Khatri SS, Furman CA, Roof RA, Mishra Y, Griffin SA, Sibley DR, Luedtke RR, Newman AH: ***N*-(3-Fluoro-4-(4-(2-methoxy or 2,3-dichlorophenyl)piperazine-1-yl)butyl)arylcarboxamides as selective dopamine D3 receptor ligands: critical role of the carboxamide linker for D3 receptor selectivity.** *J. Med. Chem.* 2011, **54**:3581–3594.
